# Supplementary material for: How Plants Sense Wounds: Damaged-Self Recognition Is Based on Plant-Derived Elicitors and Induces Octadecanoid Signaling
Source: PLoS One. 2012 Feb 9;7(2):e30537. doi: 10.1371/journal.pone.0030537 (PMC3276496; doi:10.1371/journal.pone.0030537)
Supplement: Table S3 — Expression profiles of genes represented in the “osmotic and salt stress response” MIPS categories. (XLS) [file pone.0030537.s003.xls]

## Sheet: Tables
Table S3. Expression profiles of genes represented in the "osmotic and salt stress response" MIPS categories.
Leaves Extract	Jasmonic Acid	Wound	Fire	Sucrose		P. lunatus Unigene ID	Ref_ID (Locus)	Ref_Description
3.08	3.423	1.083	2.217	12.118		contig01817_1241_152	AT4G37260	MYB73_(MYB_DOMAIN_PROTEIN_73);_DNA_binding_/_transcription_factor
2.027	2.197	0.417	1.788	0.88		contig25696_188_1897	AT4G23400	PIP1;5_(PLASMA_MEMBRANE_INTRINSIC_PROTEIN_1;5);_water_channel
2.992	3.382	1.384	3.019	3.411		contig23339_735_989	AT5G49480	ATCP1_(Ca2+-binding_protein_1);_calcium_ion_binding
3.437	2.592	1.522	3.024	1.202		contig25503_265_2424	AT2G36830	GAMMA-TIP_(GAMMA_TONOPLAST_INTRINSIC_PROTEIN);_water_channel
1.425	2.181	2.36	1.214	0.546		contig25695_808_701	AT1G13440	GAPC2_(GLYCERALDEHYDE-3-PHOSPHATE_DEHYDROGENASE_C2);_NAD_or_NADH_binding_/_binding_/_catalytic/_glyceraldehyde-3-phosphate_dehydrogenase_(phosphorylating)/_glyceraldehyde-3-phosphate_dehydrogenase
2.222	3.779	3	1.644	0.666		contig23179_506_1098	AT3G09640	APX2_(ASCORBATE_PEROXIDASE_2);_L-ascorbate_peroxidase
0.951	0.735	3.784	1.518	1.475		contig24107_490_235	AT4G02380	SAG21_(SENESCENCE-ASSOCIATED_GENE_21)
0.857	0.503	0.197	0.911	0.33		F4UYWRA02F10RT_157	AT4G03280	PETC_(PHOTOSYNTHETIC_ELECTRON_TRANSFER_C);_electron_transporter,_transferring_electrons_from_cytochrome_b6/f_complex_of_photosystem_II
2.884	1.839	8.161	2.104	2.056		contig22467_2829_1657	AT4G34710	ADC2_(ARGININE_DECARBOXYLASE_2);_arginine_decarboxylase
1.387	2.271	1.491	1.208	1.738		contig23815_1072_1402	AT5G01410	RSR4_(REDUCED_SUGAR_RESPONSE_4);_protein_heterodimerization/_protein_homodimerization
0.612	2.297	1.144	0.728	0.276		contig01088_1480_116	AT5G13930	TT4_(TRANSPARENT_TESTA_4);_naringenin-chalcone_synthase
